# Supplementary material
Source: PubMed Central journal article supplement (PMC7198231)
Supplement: NIHMS1577773-supplement-1.pdf [file NIHMS1577773-supplement-1.pdf]

## Supplemental Information

# Maternal Blood Metal levels in Association with Birth Outcomes in Northern Puerto Rico

Pahriya Ashrap, Deborah J. Watkins, Bhramar Mukherjee, Jonathan Boss, Michael J. Richards, Zaira Rosario, Carmen M. Vélez-Vega, Akram Alshawabkeh, José F Cordero, John D. Meeker

### Table of Contents:

|                                                                                                                                                                                                                                    |          |
|------------------------------------------------------------------------------------------------------------------------------------------------------------------------------------------------------------------------------------|----------|
| Table S1. Demographic Characteristics of n = 810 Pregnant Women from Puerto Rico (2010– 2017)                                                                                                                                      | Page 2-3 |
| Table S2. Blood biomarker concentrations (ng/ml) in n = 810 pregnant women from Puerto Rico in 2010– 2017 (stratified by preterm birth status) and comparison with U.S. population-based samples of women ages 18– 40 from NHANES. | Page 4   |
| Table S3. Change in birth outcomes associated with exposure biomarker concentration at each visit during pregnancy.                                                                                                                | Page 5-6 |
| Table S4. Change in birth outcomes associated with tertiles of average exposure                                                                                                                                                    | Page 7-8 |
| Table S5. Estimated environmental risk score (ERS) weights (regression coefficient) for metals selected for each birth outcome                                                                                                     | Page 9   |
| Table S6. Posterior inclusion probabilities (PIPs) for group inclusion and conditional inclusion into birth outcome models, using Bayesian kernel machine regression (BKMR) model                                                  | Page 10  |
| <b>Figure S1.</b> Heat map of pairwise correlations between blood GM concentrations among pregnant women in the PROTECT study                                                                                                      | Page 11  |

Table S1. Demographic Characteristics of n = 810 Pregnant Women from Puerto Rico (2010– 2017)

| variable                               | <b>Mean (SD)</b>                 |                        |
|----------------------------------------|----------------------------------|------------------------|
| maternal age                           | 26.7 (5.5)                       |                        |
| parity (# live births)                 | 0.7 (0.8)                        |                        |
| characteristic                         | <b>category</b>                  | <b>count (percent)</b> |
| Insurance type                         | private                          | 477 (56.7%)            |
|                                        | public (mi salud)                | 303 (36.0%)            |
|                                        | missing                          | 30 (3.6%)              |
| maternal education                     | <=high school/ged                | 174 (20.7%)            |
|                                        | some college or technical school | 284 (33.7%)            |
|                                        | college degree                   | 245 (29.1%)            |
|                                        | master's degree or higher        | 95 (11.3%)             |
|                                        | missing                          | 12 (1.4%)              |
|                                        |                                  |                        |
| household income                       | <\$10,000                        | 225 (26.7%)            |
|                                        | ≥\$10,000 to <\$30,000           | 229 (27.2%)            |
|                                        | ≥\$30,000 to <\$50,000           | 156 (18.5%)            |
|                                        | ≥\$50,000                        | 93 (11.0%)             |
|                                        | missing                          | 107 (12.7%)            |
| marital status                         | single                           | 162 (19.2%)            |
|                                        | married or living together       | 639 (75.9%)            |
|                                        | missing                          | 9 (1.1%)               |
| gravidity (# pregnancies)              | 0                                | 337 (40.0%)            |
|                                        | 1                                | 290 (34.4%)            |
|                                        | >1                               | 175 (20.8%)            |
|                                        | missing                          | 8 (1.0%)               |
| prepregnancy BMI (kg m <sup>-2</sup> ) | ≤25                              | 412 (48.9%)            |
|                                        | >25 to ≤30                       | 247 (29.3%)            |
|                                        | >30                              | 145 (17.2%)            |

|                                      |                               |             |
|--------------------------------------|-------------------------------|-------------|
|                                      | missing                       | 6 (0.7%)    |
| employment status                    | employed                      | 488 (58.0%) |
|                                      | unemployed                    | 309 (36.7%) |
|                                      | missing                       | 13 (1.5%)   |
| smoking                              | never                         | 676 (80.3%) |
|                                      | ever                          | 115 (13.7%) |
|                                      | current                       | 11 (1.3%)   |
|                                      | missing                       | 8 (1.0%)    |
| exposure to<br>secondhand<br>smoking | none                          | 694 (82.4%) |
|                                      | up to 1 hour                  | 25 (3.0%)   |
|                                      | more than 1 hour              | 51 (6.1%)   |
|                                      | missing                       | 40 (4.8%)   |
| alcohol<br>consumption               | none                          | 387 (46.0%) |
|                                      | before pregnancy              | 354 (42.0%) |
|                                      | within the last<br>few months | 57 (6.8%)   |
|                                      | missing                       | 12 (1.4%)   |

Table S2. Blood biomarker concentrations (ng/ml) in n = 810 pregnant women from Puerto Rico<sup>a</sup> in 2010– 2017 (stratified by preterm birth status) and comparison with U.S. population-based samples of women ages 18– 40 from NHANES.<sup>b,c</sup>

| Metals    | LOD  | % >LOD | Preterm Birth |        |     |        | Term Birth |        |     |        | NHANES |     |        |
|-----------|------|--------|---------------|--------|-----|--------|------------|--------|-----|--------|--------|-----|--------|
|           |      |        | N             | GM     | GSD | Median | N          | GM     | GSD | Median | GM     | GSD | Median |
| <b>Co</b> | 0.2  | 98.3   | 112           | 0.3    | 1.4 | 0.3    | 1031       | 0.3    | 1.4 | 0.3    |        |     |        |
| <b>Cs</b> | 0.04 | 99.9   | 112           | 1.2    | 1.4 | 1.2    | 1031       | 1.1    | 1.4 | 1.2    |        |     |        |
| <b>Cu</b> | 9    | 99.9   | 112           | 1623.1 | 1.2 | 1620.2 | 1031       | 1543.2 | 1.3 | 1555.4 |        |     |        |
| <b>Mn</b> | 2    | 99.9   | 112           | 11.9   | 1.4 | 12.0   | 1031       | 11.2   | 1.4 | 11.2   | 10.7   | 1.4 | 10.6   |
| <b>Ni</b> | 0.5  | 96.4   | 112           | 1.0    | 1.7 | 1.0    | 1031       | 1.0    | 1.6 | 1.0    |        |     |        |
| <b>Zn</b> | 24   | 99.9   | 112           | 5003.6 | 1.1 | 5030.1 | 1031       | 4640.5 | 1.3 | 4712.1 |        |     |        |
| <b>As</b> | 0.3  | 49.3   | 112           | 0.3    | 1.7 | 0.2    | 1031       | 0.3    | 1.8 | 0.2    |        |     |        |
| <b>Cd</b> | 0.1  | 60.8   | 112           | 0.1    | 1.6 | 0.1    | 1031       | 0.1    | 1.7 | 0.1    | 0.3    | 2.2 | 0.3    |
| <b>Hg</b> | 0.2  | 99.9   | 112           | 1.3    | 1.7 | 1.3    | 1031       | 1.2    | 1.7 | 1.2    | 0.7    | 2.5 | 0.7    |
| <b>Pb</b> | 0.02 | 99.9   | 112           | 3.9    | 1.6 | 3.6    | 1031       | 3.2    | 1.5 | 3.2    | 6.4    | 1.8 | 6.1    |

<sup>a</sup> Includes biomarker concentrations for up to 2 repeated samples per woman (n = 1,143 samples); <sup>b</sup> Females 18–40 years of age; n = 3,585 for biomarkers measured in 2009-2010, 2011-2012, 2013-2014, and 2015-2016 NHANES; <sup>c</sup> NHANES, National Health and Nutrition Examination Survey; LOD, limit of detection; GM, geometric mean, GSD, geometric standard deviation;

Table S3. Change in birth outcomes associated with exposure biomarker concentration at each visit during pregnancy. Effect estimates presented as changes or odds ratio (OR) for IQR increase in exposure biomarker concentration. Models were adjusted for maternal age, maternal education, pre-pregnancy BMI, and exposure to secondhand smoking.

| Metals                         | Gestational age |                            |                |         |                            |               | Birthweight z-score |                               |               |         |                               |               |
|--------------------------------|-----------------|----------------------------|----------------|---------|----------------------------|---------------|---------------------|-------------------------------|---------------|---------|-------------------------------|---------------|
|                                | Visit 1         |                            |                | Visit 3 |                            |               | Visit 1             |                               |               | Visit 3 |                               |               |
|                                | N               | Change in days<br>(95% CI) | P value        | N       | Change in days<br>(95% CI) | P value       | N                   | Change in z-score<br>(95% CI) | P value       | N       | Change in z-score<br>(95% CI) | P value       |
| Co                             | 610             | -0.6 (-1.8, 0.7)           | 0.38           | 472     | -0.7 (-2.1, 0.6)           | 0.30          | 568                 | -0.01 (-0.1, 0.08)            | 0.82          | 440     | <b>0.13 (0.02, 0.23)</b>      | <b>0.02**</b> |
| Cs                             | 610             | 0.2 (-1.4, 1.7)            | 0.84           | 472     | -1.3 (-3.0, 0.4)           | 0.14          | 568                 | 0.00 (-0.11, 0.11)            | 0.97          | 440     | <b>0.16 (0.02, 0.30)</b>      | <b>0.02*</b>  |
| Cu                             | 610             | -0.3 (-1.3, 0.6)           | 0.47           | 472     | -0.6 (-1.9, 0.8)           | 0.43          | 568                 | 0.00 (-0.07, 0.06)            | 0.89          | 440     | 0.09 (-0.02, 0.21)            | 0.10          |
| Mn                             | 610             | -1.0 (-2.6, 0.5)           | 0.19           | 472     | -1.0 (-2.6, 0.6)           | 0.21          | 568                 | 0.02 (-0.09, 0.14)            | 0.71          | 440     | 0.11 (-0.02, 0.24)            | 0.10          |
| Ni                             | 610             | 0.5 (-0.6, 1.7)            | 0.37           | 472     | 0.2 (-1.1, 1.4)            | 0.76          | 568                 | 0.00 (-0.09, 0.09)            | 1.00          | 440     | <b>0.13 (0.03, 0.24)</b>      | <b>0.01*</b>  |
| Zn                             | 610             | -0.7 (-1.6, 0.2)           | 0.15           | 472     | <b>-1.4 (-2.8, 0.0)</b>    | <b>0.05*</b>  | 568                 | 0.01 (-0.06, 0.07)            | 0.84          | 440     | 0.00 (-0.12, 0.12)            | 0.99          |
| As                             | 610             | 1.2 (-0.5, 2.9)            | 0.17           | 472     | 0.2 (-1.4, 1.9)            | 0.77          | 568                 | 0.08 (-0.04, 0.21)            | 0.21          | 440     | 0.06 (-0.08, 0.20)            | 0.38          |
| Cd                             | 610             | -1.2 (-3.3, 0.8)           | 0.25           | 472     | 0.2 (-1.8, 2.2)            | 0.86          | 568                 | -0.04 (-0.20, 0.11)           | 0.56          | 440     | -0.04 (-0.20, 0.12)           | 0.63          |
| Hg                             | 610             | 0.6 (-1.0, 2.2)            | 0.47           | 472     | -0.5 (-2.1, 1.0)           | 0.51          | 568                 | 0.01 (-0.11, 0.13)            | 0.88          | 440     | 0.07 (-0.06, 0.19)            | 0.32          |
| Pb                             | 610             | -1.9 (-3.3, -0.4)          | <b>0.01**</b>  | 472     | <b>-1.6 (-3.2, 0.0)</b>    | <b>0.05**</b> | 568                 | 0.04 (-0.07, 0.14)            | 0.50          | 440     | 0.08 (-0.05, 0.21)            | 0.25          |
| <b>Preterm birth (overall)</b> |                 |                            |                |         |                            |               |                     |                               |               |         |                               |               |
|                                | Visit 1         |                            |                | Visit 3 |                            |               | Visit 1             |                               |               | Visit 3 |                               |               |
|                                | N               | OR (95% CI)                | P value        | N       | OR (95% CI)                | P value       | N                   | OR (95% CI)                   | P value       | N       | OR (95% CI)                   | P value       |
| Co                             | 610             | 1.08 (0.82, 1.42)          | 0.57           | 472     | 1.03 (0.73, 1.44)          | 0.88          | 587                 | 1.23 (0.90, 1.70)             | 0.20          | 449     | 1.15 (0.73, 1.82)             | 0.54          |
| Cs                             | 610             | 1.11 (0.77, 1.61)          | 0.59           | 472     | 1.39 (0.89, 2.18)          | 0.15          | 587                 | 1.09 (0.69, 1.71)             | 0.72          | 449     | 1.25 (0.70, 2.25)             | 0.45          |
| Cu                             | 610             | 1.23 (0.87, 1.74)          | 0.23           | 472     | 1.28 (0.90, 1.82)          | 0.17          | 587                 | 1.19 (0.78, 1.82)             | 0.43          | 449     | 1.14 (0.71, 1.82)             | 0.59          |
| Mn                             | 610             | 1.29 (0.92, 1.80)          | 0.14           | 472     | 1.23 (0.82, 1.85)          | 0.31          | 587                 | 1.38 (0.92, 2.06)             | 0.12          | 449     | 1.20 (0.71, 2.05)             | 0.50          |
| Ni                             | 610             | 0.88 (0.67, 1.16)          | 0.37           | 472     | 1.03 (0.75, 1.41)          | 0.87          | 587                 | 0.89 (0.64, 1.25)             | 0.51          | 449     | 1.10 (0.73, 1.66)             | 0.63          |
| Zn                             | 610             | <b>1.80 (1.23, 2.64)</b>   | <b>0.002**</b> | 472     | <b>1.59 (1.07, 2.36)</b>   | <b>0.02*</b>  | 587                 | <b>1.81 (1.13, 2.90)</b>      | <b>0.01**</b> | 449     | 1.32 (0.79, 2.20)             | 0.29          |
| As                             | 610             | 0.79 (0.52, 1.20)          | 0.27           | 472     | 0.95 (0.61, 1.48)          | 0.83          | 587                 | 0.92 (0.57, 1.49)             | 0.73          | 449     | 0.87 (0.46, 1.62)             | 0.65          |
| Cd                             | 610             | 1.08 (0.69, 1.70)          | 0.74           | 472     | 0.78 (0.47, 1.29)          | 0.34          | 587                 | 1.49 (0.87, 2.54)             | 0.15          | 449     | 0.80 (0.41, 1.55)             | 0.51          |
| Hg                             | 610             | 1.09 (0.75, 1.57)          | 0.65           | 472     | <b>1.47 (0.99, 2.19)</b>   | <b>0.06*</b>  | 587                 | 1.23 (0.79, 1.91)             | 0.36          | 449     | <b>2.18 (1.28, 3.72)</b>      | <b>0.004*</b> |
| Pb                             | 610             | <b>1.70 (1.20, 2.43)</b>   | <b>0.003*</b>  | 472     | <b>1.49 (1.00, 2.20)</b>   | <b>0.05*</b>  | 587                 | <b>1.82 (1.19, 2.77)</b>      | <b>0.01**</b> | 449     | 1.34 (0.78, 2.28)             | 0.29          |
| <b>SGA</b>                     |                 |                            |                |         |                            |               |                     |                               |               |         |                               |               |
|                                | Visit 1         |                            |                | Visit 3 |                            |               | Visit 1             |                               |               | Visit 3 |                               |               |
|                                | N               | OR (95% CI)                | P value        | N       | OR (95% CI)                | P value       | N                   | OR (95% CI)                   | P value       | N       | OR (95% CI)                   | P value       |
| <b>LGA</b>                     |                 |                            |                |         |                            |               |                     |                               |               |         |                               |               |
|                                | Visit 1         |                            |                | Visit 3 |                            |               | Visit 1             |                               |               | Visit 3 |                               |               |
|                                | N               | OR (95% CI)                | P value        | N       | OR (95% CI)                | P value       | N                   | OR (95% CI)                   | P value       | N       | OR (95% CI)                   | P value       |

|    |     |                          |              |     |                          |               |     |                   |      |      |                   |      |
|----|-----|--------------------------|--------------|-----|--------------------------|---------------|-----|-------------------|------|------|-------------------|------|
| Co | 505 | 0.99 (0.72, 1.37)        | 0.97         | 403 | 0.75 (0.52, 1.09)        | 0.14          | 521 | 0.95 (0.72, 1.26) | 0.72 | 0.72 | 1.30 (0.92, 1.84) | 0.14 |
| Cs | 505 | 0.93 (0.66, 1.31)        | 0.68         | 403 | 0.68 (0.45, 1.03)        | 0.07          | 521 | 1.06 (0.75, 1.51) | 0.73 | 0.73 | 1.47 (0.9, 2.41)  | 0.12 |
| Cu | 505 | 1.00 (0.80, 1.26)        | 0.99         | 403 | 0.98 (0.71, 1.35)        | 0.89          | 521 | 0.96 (0.81, 1.14) | 0.65 | 0.65 | 1.22 (0.82, 1.82) | 0.33 |
| Mn | 505 | 0.87 (0.59, 1.27)        | 0.46         | 403 | <b>0.65 (0.43, 0.97)</b> | <b>0.03**</b> | 521 | 0.98 (0.69, 1.38) | 0.91 | 0.91 | 1.12 (0.70, 1.77) | 0.64 |
| Ni | 505 | <b>0.71 (0.51, 1.00)</b> | <b>0.05*</b> | 403 | <b>0.63 (0.45, 0.88)</b> | <b>0.01**</b> | 521 | 0.81 (0.61, 1.07) | 0.14 | 0.14 | 1.23 (0.89, 1.70) | 0.20 |
| Zn | 505 | 1.02 (0.79, 1.30)        | 0.90         | 403 | 1.04 (0.72, 1.50)        | 0.83          | 521 | 1.04 (0.80, 1.34) | 0.77 | 0.77 | 0.95 (0.64, 1.42) | 0.80 |
| As | 505 | <b>0.63 (0.37, 1.05)</b> | <b>0.08*</b> | 403 | 0.75 (0.47, 1.22)        | 0.25          | 521 | 0.97 (0.65, 1.44) | 0.87 | 0.87 | 1.01 (0.63, 1.60) | 0.98 |
| Cd | 505 | 0.78 (0.45, 1.34)        | 0.36         | 403 | 1.08 (0.66, 1.75)        | 0.77          | 521 | 0.77 (0.48, 1.23) | 0.27 | 0.27 | 1.21 (0.70, 2.07) | 0.49 |
| Hg | 505 | 0.93 (0.62, 1.39)        | 0.73         | 403 | 0.73 (0.49, 1.09)        | 0.13          | 521 | 1.12 (0.79, 1.59) | 0.53 | 0.53 | 1.14 (0.74, 1.77) | 0.56 |
| Pb | 505 | 0.92 (0.66, 1.27)        | 0.60         | 403 | 0.76 (0.50, 1.17)        | 0.21          | 521 | 0.97 (0.71, 1.32) | 0.84 | 0.84 | 0.82 (0.52, 1.31) | 0.42 |

Table S4. Change in birth outcomes associated with tertiles of average exposure<sup>abcdef</sup>. Effect estimates presented as changes or odds ratio (OR) for IQR increase in exposure biomarker concentration. Models were adjusted for maternal age, maternal education, pre-pregnancy BMI, and exposure to secondhand smoking.

| Metals               | Gestational age |                                |               |                            |               | Birthweight z-score                |                               |               |                               |               |
|----------------------|-----------------|--------------------------------|---------------|----------------------------|---------------|------------------------------------|-------------------------------|---------------|-------------------------------|---------------|
|                      | N               | Change in days<br>(95% CI)     | P value       | Change in days<br>(95% CI) | P value       | N                                  | Change in z-score<br>(95% CI) | P value       | Change in z-score<br>(95% CI) | P value       |
| Essential metals     |                 | <b>Tertile 1 vs 2</b>          |               | <b>Tertile 3 vs 2</b>      |               |                                    | <b>Tertile 1 vs 2</b>         |               | <b>Tertile 3 vs 2</b>         |               |
| Co <sup>a</sup>      | 764             | -0.8 (-3.4, 1.8)               | 0.54          | -1.7 (4.2, 0.9)            | 0.21          | 712                                | -0.01 (-0.20, 0.19)           | 0.95          | 0.01 (-0.18, 0.21)            | 0.88          |
| Cs <sup>b</sup>      | 764             | -0.6 (-3.1, 2.0)               | 0.67          | -0.5 (-3.1, 2.1)           | 0.71          | 712                                | -0.05 (-0.24, 0.15)           | 0.63          | 0.08 (-0.12, 0.28)            | 0.44          |
| Cu <sup>a</sup>      | 764             | -1.2 (-3.8, 1.3)               | 0.35          | <b>-2.5 (-5.1, 0.1)</b>    | <b>0.06*</b>  | 712                                | <b>-0.20 (-0.39, 0.00)</b>    | <b>0.05*</b>  | <b>-0.23 (-0.43, -0.03)</b>   | <b>0.02**</b> |
| Mn <sup>a</sup>      | 764             | -1.4 (-4.0, 1.2)               | 0.28          | <b>-2.9 (-5.5, 0.3)</b>    | <b>0.03**</b> | 712                                | 0.05 (-0.14, 0.25)            | 0.60          | <b>0.18 (-0.01, 0.38)</b>     | <b>0.07*</b>  |
| Ni <sup>a</sup>      | 764             | 0.4 (-2.2, 3.0)                | 0.75          | 2.0 (-0.6, 4.5)            | 0.13          | 712                                | -0.03 (-0.23, 0.17)           | 0.78          | 0.04 (-0.15, 0.23)            | 0.69          |
| Zn <sup>a</sup>      | 764             | 1.0 (-1.6, 3.5)                | 0.46          | -1.1 (-3.7, 1.5)           | 0.40          | 712                                | 0.01 (-0.19, 0.20)            | 0.95          | -0.05 (-0.24, 0.15)           | 0.64          |
| Non-essential metals |                 | <b>Tertile 2 vs 1</b>          |               | <b>Tertile 3 vs 1</b>      |               |                                    | <b>Tertile 2 vs 1</b>         |               | <b>Tertile 3 vs 1</b>         |               |
| As <sup>c</sup>      | 764             | 1.5 (-0.6, 3.6)                | 0.17          | -                          | -             | 712                                | 0.04 (-0.12, 0.20)            | 0.61          | -                             | -             |
| Cd <sup>c</sup>      | 764             | -1.4 (-3.6, 0.7)               | 0.19          | -                          | -             | 712                                | 0.01 (-0.15, 0.17)            | 0.91          | -                             | -             |
| Hg <sup>d</sup>      | 764             | -1.5 (-4.1, 1.0)               | 0.24          | 0.8 (-1.8, 3.4)            | 0.56          | 712                                | 0.13 (-0.06, 0.33)            | 0.18          | 0.03 (-0.16, 0.23)            | 0.74          |
| Pb <sup>d</sup>      | 764             | 0.2 (-2.4, 2.7)                | 0.90          | <b>-2.9 (-5.5, 0.3)</b>    | <b>0.03**</b> | 712                                | -0.08 (-0.28, 0.11)           | 0.42          | 0.10 (-0.09, 0.30)            | 0.30          |
|                      |                 | <b>Preterm birth (overall)</b> |               |                            |               | <b>Preterm birth (spontaneous)</b> |                               |               |                               |               |
| Metals               | N               | OR (95% CI)                    | P value       | OR (95% CI)                | P value       | N                                  | OR (95% CI)                   | P value       | OR (95% CI)                   | P value       |
| Essential metals     |                 | <b>Tertile 1 vs 2</b>          |               | <b>Tertile 3 vs 2</b>      |               |                                    | <b>Tertile 1 vs 2</b>         |               | <b>Tertile 3 vs 2</b>         |               |
| Co <sup>a</sup>      | 764             | 0.79 (0.43, 1.43)              | 0.43          | 1.12 (0.64, 1.97)          | 0.69          | 732                                | 0.51 (0.22, 1.17)             | 0.11          | 1.23 (0.62, 2.42)             | 0.55          |
| Cs <sup>b</sup>      | 764             | 1.09 (0.60, 1.95)              | 0.78          | 1.20 (0.66, 2.18)          | 0.54          | 732                                | 1.16 (0.55, 2.43)             | 0.70          | 1.13 (0.53, 2.43)             | 0.75          |
| Cu <sup>a</sup>      | 764             | 1.01 (0.53, 1.93)              | 0.97          | <b>1.70 (0.95, 3.05)</b>   | <b>0.07*</b>  | 732                                | 1.14 (0.50, 2.57)             | 0.76          | 1.79 (0.85, 3.79)             | 0.13          |
| Mn <sup>a</sup>      | 764             | 1.24 (0.66, 2.32)              | 0.50          | <b>1.84 (1.02, 3.29)</b>   | <b>0.04**</b> | 732                                | <b>2.24 (0.93, 5.38)</b>      | <b>0.07*</b>  | <b>3.17 (1.37, 7.33)</b>      | <b>0.01**</b> |
| Ni <sup>a</sup>      | 764             | 1.00 (0.58, 1.73)              | 1.00          | <b>0.58 (0.31, 1.07)</b>   | <b>0.08*</b>  | 732                                | 1.10 (0.55, 2.18)             | 0.79          | 0.53 (0.23, 1.18)             | 0.12          |
| Zn <sup>a</sup>      | 764             | 0.56 (0.29, 1.10)              | 0.09          | 1.44 (0.84, 2.47)          | 0.19          | 732                                | 0.67 (0.30, 1.48)             | 0.32          | 1.21 (0.60, 2.43)             | 0.59          |
| Non-essential metals |                 | <b>Tertile 2 vs 1</b>          |               | <b>Tertile 3 vs 1</b>      |               |                                    | <b>Tertile 2 vs 1</b>         |               | <b>Tertile 3 vs 1</b>         |               |
| As <sup>c</sup>      | 764             | 0.75 (0.46, 1.20)              | 0.23          | -                          | -             | 732                                | 0.73 (0.40, 1.34)             | 0.31          | -                             | -             |
| Cd <sup>c</sup>      | 764             | 1.14 (0.70, 1.86)              | 0.60          | -                          | -             | 732                                | 1.50 (0.78, 2.87)             | 0.22          | -                             | -             |
| Hg <sup>d</sup>      | 764             | <b>1.90 (1.06, 3.42)</b>       | <b>0.03**</b> | 1.36 (0.72, 2.57)          | 0.34          | 732                                | <b>3.04 (1.32, 7.00)</b>      | <b>0.01**</b> | <b>2.20 (0.91, 5.32)</b>      | <b>0.08*</b>  |
| Pb <sup>d</sup>      | 764             | 1.11 (0.58, 2.11)              | 0.76          | <b>1.88 (1.03, 3.43)</b>   | <b>0.04**</b> | 732                                | 0.74 (0.32, 1.74)             | 0.49          | 1.75 (0.85, 3.61)             | 0.13          |

|                      | SGA |                          |               |                          |                | LGA |                       |         |                          |              |
|----------------------|-----|--------------------------|---------------|--------------------------|----------------|-----|-----------------------|---------|--------------------------|--------------|
|                      | N   | OR (95% CI)              | P value       | OR (95% CI)              | P value        | N   | OR (95% CI)           | P value | OR (95% CI)              | P value      |
| Essential metals     |     | <b>Tertile 1 vs 2</b>    |               | <b>Tertile 3 vs 2</b>    |                |     | <b>Tertile 1 vs 2</b> |         | <b>Tertile 3 vs 2</b>    |              |
| Co <sup>a</sup>      | 639 | 1.21 (0.65, 2.28)        | 0.55          | 1.09 (0.58, 2.05)        | 0.80           | 645 | 0.74 (0.41, 1.34)     | 0.32    | 0.75 (0.42, 1.36)        | 0.35         |
| Cs <sup>b</sup>      | 639 | 1.56 (0.86, 2.85)        | 0.14          | 0.81 (0.41, 1.61)        | 0.55           | 645 | 1.04 (0.55, 1.95)     | 0.90    | 1.31 (0.72, 2.39)        | 0.37         |
| Cu <sup>a</sup>      | 639 | <b>2.05 (1.04, 4.04)</b> | <b>0.04**</b> | <b>1.86 (0.92, 3.75)</b> | <b>0.08*</b>   | 645 | 1.25 (0.69, 2.24)     | 0.46    | 0.76 (0.40, 1.43)        | 0.40         |
| Mn <sup>a</sup>      | 639 | 0.96 (0.53, 1.74)        | 0.89          | 0.66 (0.35, 1.27)        | 0.22           | 645 | 1.09 (0.59, 2.01)     | 0.79    | 1.15 (0.63, 2.11)        | 0.64         |
| Ni <sup>a</sup>      | 639 | 0.88 (0.50, 1.56)        | 0.67          | <b>0.36 (0.18, 0.73)</b> | <b>0.004**</b> | 645 | 0.78 (0.42, 1.43)     | 0.42    | 0.80 (0.44, 1.43)        | 0.45         |
| Zn <sup>a</sup>      | 639 | 1.05 (0.56, 1.96)        | 0.88          | 1.05 (0.56, 1.98)        | 0.88           | 645 | 0.71 (0.39, 1.27)     | 0.24    | <b>0.58 (0.31, 1.06)</b> | <b>0.07*</b> |
| Non-essential metals |     | <b>Tertile 2 vs 1</b>    |               | <b>Tertile 3 vs 1</b>    |                |     | <b>Tertile 2 vs 1</b> |         | <b>Tertile 3 vs 1</b>    |              |
| As <sup>c</sup>      | 639 | 0.79 (0.47, 1.32)        | 0.37          | -                        | -              | 645 | 0.95 (0.58, 1.55)     | 0.83    | -                        | -            |
| Cd <sup>c</sup>      | 639 | 0.73 (0.44, 1.23)        | 0.24          | -                        | -              | 645 | 0.79 (0.48, 1.30)     | 0.36    | -                        | -            |
| Hg <sup>d</sup>      | 639 | 0.70 (0.37, 1.32)        | 0.27          | 0.88 (0.48, 1.61)        | 0.68           | 645 | 1.66 (0.90, 3.05)     | 0.10    | 1.17 (0.61, 2.24)        | 0.64         |
| Pb <sup>d</sup>      | 639 | 1.37 (0.76, 2.46)        | 0.29          | 0.56 (0.28, 1.13)        | 0.11           | 645 | 1.15 (0.64, 2.08)     | 0.64    | 0.79 (0.42, 1.47)        | 0.45         |

<sup>a</sup> Referent levels were set at tertile 2 for essential metals (Co, Cu, Mn, Ni, Zn).

<sup>b</sup> Cs is not regarded as essential to the health of plants or animals, nor does it present a hazard to them. For this analysis, Cs was considered as essential metal, therefore, referent levels were set at tertile 2.

<sup>c</sup> As, Cd were categorized as below LOD or above LOD as they have 50 and 40 % of samples <LOD

<sup>d</sup> Referent levels were set at tertile 1 for non-essential metals (Hg, Pb).

\*\* p value < 0.01.

\* p value from 0.05 to 0.01.



Table S5. Estimated environmental risk score (ERS) weights (regression coefficient) for metals selected for each birth outcome. Models were adjusted for maternal age, maternal education, pre-pregnancy BMI, and exposure to secondhand smoking.

| <i>Metal</i> | <i>Weights</i>  |                     |                         |                             |     |     |
|--------------|-----------------|---------------------|-------------------------|-----------------------------|-----|-----|
|              | Gestational Age | Birthweight z-score | Preterm birth (overall) | Preterm birth (spontaneous) | SGA | LGA |
| <i>Co</i>    |                 |                     |                         |                             |     |     |
| <i>Cs</i>    |                 |                     |                         |                             |     |     |
| <i>Cu</i>    |                 |                     |                         |                             |     |     |
| <i>Mn</i>    |                 |                     |                         |                             |     |     |
| <i>Ni</i>    |                 |                     |                         |                             |     |     |
| <i>Zn</i>    |                 |                     | 0.005                   |                             |     |     |
| <i>As</i>    |                 |                     |                         |                             |     |     |
| <i>Cd</i>    |                 |                     |                         |                             |     |     |
| <i>Hg</i>    |                 |                     |                         |                             |     |     |
| <i>Pb</i>    | -0.090          |                     | 0.070                   | 0.120                       |     |     |

Table S6. Posterior inclusion probabilities (PIPs) for group inclusion and conditional inclusion into birth outcome models, using Bayesian kernel machine regression (BKMR) model. Models were adjusted for maternal age, maternal education, pre-pregnancy BMI, and exposure to secondhand smoking.

| Metal | Group | Gestational Age |             | Birthweight z-score |             | Preterm Birth (overall) |             | Preterm Birth (spontaneous) |             | SGA         |             | LGA      |         |
|-------|-------|-----------------|-------------|---------------------|-------------|-------------------------|-------------|-----------------------------|-------------|-------------|-------------|----------|---------|
|       |       | groupPIP        | condPIP     | groupPIP            | condPIP     | groupPIP                | condPIP     | groupPIP                    | condPIP     | groupPIP    | condPIP     | groupPIP | condPIP |
| As    | 1     | 0.62            | 0.06        | 0.63                | 0.26        | 0.71                    | 0.04        | 0.64                        | 0.09        | 0.51        | 0.32        | 0.37     | 0.20    |
| Cd    | 1     | 0.62            | 0.35        | 0.63                | 0.24        | 0.71                    | 0.04        | 0.64                        | 0.07        | 0.51        | 0.43        | 0.37     | 0.34    |
| Hg    | 1     | 0.62            | 0.03        | 0.63                | 0.28        | 0.71                    | 0.02        | 0.64                        | 0.20        | 0.51        | 0.11        | 0.37     | 0.21    |
| Pb    | 1     | <b>0.62</b>     | <b>0.57</b> | 0.63                | 0.21        | <b>0.71</b>             | <b>0.90</b> | <b>0.64</b>                 | <b>0.64</b> | 0.51        | 0.14        | 0.37     | 0.25    |
| Co    | 2     | 0.35            | 0.65        | <b>0.62</b>         | <b>0.52</b> | 0.51                    | 0.49        | 0.68                        | 0.49        | 0.47        | 0.51        | 0.47     | 0.60    |
| Mn    | 2     | 0.35            | 0.35        | 0.62                | 0.48        | <b>0.51</b>             | <b>0.51</b> | <b>0.68</b>                 | <b>0.51</b> | 0.47        | 0.49        | 0.47     | 0.40    |
| Cs    | 3     | 0.26            | 0.19        | 0.62                | 0.23        | 0.90                    | 0.03        | 0.59                        | 0.08        | 0.85        | 0.08        | 0.41     | 0.30    |
| Cu    | 3     | 0.26            | 0.29        | 0.62                | 0.25        | 0.90                    | 0.06        | 0.59                        | 0.19        | 0.85        | 0.05        | 0.41     | 0.28    |
| Ni    | 3     | 0.26            | 0.09        | 0.62                | 0.28        | 0.90                    | 0.05        | 0.59                        | 0.24        | <b>0.85</b> | <b>0.83</b> | 0.41     | 0.18    |
| Zn    | 3     | 0.26            | 0.43        | 0.62                | 0.24        | <b>0.90</b>             | <b>0.85</b> | 0.59                        | 0.49        | 0.85        | 0.05        | 0.41     | 0.24    |

**Figure S1.** Heatmap of pairwise correlations between blood GM concentrations among pregnant women in the PROTECT study<sup>a</sup>.

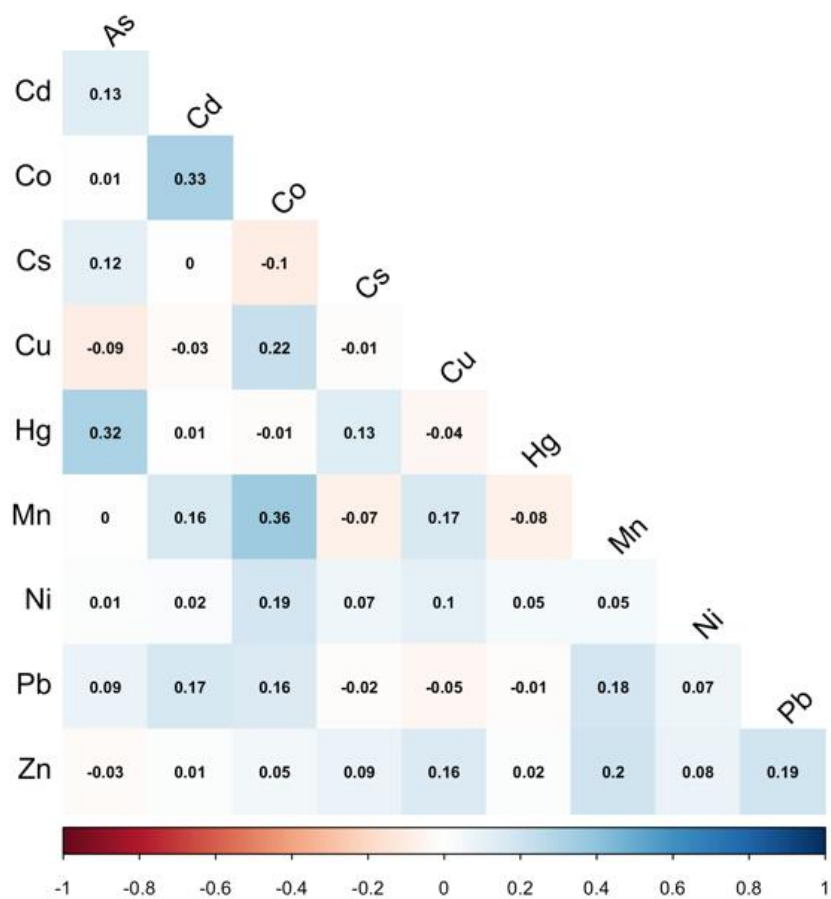

<sup>a</sup> The correlation heatmap was created using natural log transformed blood metal concentrations.
